# Supplementary material for: CLR (C-Reactive Protein to Lymphocyte Ratio) Served as a Promising Predictive Biomarker for Cerebral Vasospasm in Aneurysmal Subarachnoid Hemorrhage (aSAH): A Retrospective Cohort Study
Source: MDPI journal article supplement (doi:10.3390/jcm13040940), 2024-02-06
Supplement: s1 [file s1]

# CLR (C-Reactive Protein to Lymphocyte Ratio) Served as a Promising Predictive Biomarker for Cerebral Vasospasm in Aneurysmal Subarachnoid Hemorrhage (aSAH): A Retrospective Cohort Study

Ke Li <sup>1</sup>, Dilaware Khan <sup>1</sup>, Igor Fischer <sup>1</sup>, Daniel Hänggi <sup>2,3</sup>, Jan F. Cornelius <sup>1</sup> and Sajjad Muhammad <sup>1,2,4,\*</sup>

- <sup>1</sup> Department of Neurosurgery, Medical Faculty and University Hospital Düsseldorf, Heinrich-Heine-University Düsseldorf, 40225 Düsseldorf, Germany; ke.li@uni-duesseldorf.de (K.L.); dilaware.khan@med.uni-duesseldorf.de (D.K.); igor.fischer@med.uni-duesseldorf.de (I.F.); cornelius@med.uni-duesseldorf.de (J.F.C.)
- <sup>2</sup> Department of Neurosurgery, King Edward Medical University, Lahore 54000, Pakistan; haenggi-assistant@ini-hannover.de
- <sup>3</sup> Department of Neurosurgery, International Neuroscience Institute, 30625 Hannover, Germany
- <sup>4</sup> Department of Neurosurgery, University of Helsinki, Helsinki University Hospital, 00290 Helsinki, Finland
- \* Correspondence: sajjad.muhammad@med.uni-duesseldorf.de; Tel.: +492118107823

## Supplemental Files

### Table of contents

|                        |   |         |
|------------------------|---|---------|
| Supplemental Table S1  | - | Page 2  |
| Supplemental Table S2  | - | Page 4  |
| Supplemental Table S3  | - | Page 6  |
| Supplemental Table S4  | - | Page 8  |
| Supplemental Table S5  | - | Page 9  |
| Supplemental Table S6  | - | Page 10 |
| Supplemental Figure S1 |   | Page 11 |
| Supplemental Table S7  | - | Page 12 |
| Supplemental Figure S2 |   | Page 13 |
| Supplemental Table S8  | - | Page 14 |
| Supplemental Figure S3 |   | Page 15 |
| Supplemental Table S9  | - | Page 16 |

**Supplemental Table S1** Univariate analysis on outcome (6 months mRS) after aSAH

| Variables                                | mRS (0–2) (n = 82)     | mRS (3–6) (n = 84)     | <i>p</i> value |
|------------------------------------------|------------------------|------------------------|----------------|
| Demographics                             |                        |                        |                |
| Age, mean (SD), y                        | 51.74±11.54            | 59.32±11.74            | <0.001*        |
| Female sex, n (%)                        | 49 (59.8)              | 65 (77.4)              | 0.014*         |
| Medical history, n (%)                   |                        |                        |                |
| Hypertension                             | 55 (67.1)              | 62 (73.8)              | 0.341          |
| Admission status, median (IQR)           |                        |                        |                |
| WFNS grade                               | 1 (1–2)                | 5 (2–5)                | <0.001*        |
| GCS score                                | 15 (14–15)             | 4 (3–13)               | <0.001*        |
| Admission serum biomarkers, median (IQR) |                        |                        |                |
| CRP, (mg/dL)                             | 0.40 (0.20–0.90)       | 0.75 (0.20–2.43)       | 0.014*         |
| WBC, (×10 <sup>9</sup> /L)               | 12.20 (10.00–14.70)    | 14.20 (11.25–17.30)    | 0.012*         |
| Platelet, (×10 <sup>9</sup> /L)          | 237.50 (208.50–279.75) | 227.00 (184.50–277.25) | 0.381          |
| Neutrophil, (×10 <sup>9</sup> /L)        | 10.44 (7.90–12.73)     | 12.05 (9.12–15.09)     | 0.014*         |
| Lymphocyte, (×10 <sup>9</sup> /L)        | 1.15 (0.85–1.67)       | 0.95 (0.60–1.56)       | 0.018*         |
| Monocyte, (×10 <sup>9</sup> /L)          | 0.72 (0.49–0.94)       | 0.80 (0.56–1.09)       | 0.146          |
| CLR, (mg×10 <sup>-6</sup> )              | 0.34 (0.13–0.83)       | 0.77 (0.20–2.74)       | 0.002*         |
| NLR                                      | 8.74 (5.32–13.32)      | 12.75 (7.11–19.17)     | 0.001*         |
| PLR                                      | 206.73 (140.36–294.97) | 238.72 (156.84–362.25) | 0.069          |
| MLR                                      | 0.55 (0.39–0.74)       | 0.70 (0.51–1.12)       | 0.001*         |
| Neuroradiological data                   |                        |                        |                |
| mFisher score, median (IQR)              | 3 (3–4)                | 4 (3–4)                | <0.001*        |
| Intracerebral hemorrhage, n (%)          | 7 (8.5)                | 30 (35.7)              | <0.001*        |
| Subdural hemorrhage, n (%)               | 3 (3.7)                | 11 (11.3)              | 0.029*         |
| Aneurysmal locations, n (%)              |                        |                        | 0.355          |
| ACA/ACOM                                 | 42 (51.2)              | 35 (41.7)              |                |
| MCA                                      | 19 (23.2)              | 19 (22.6)              |                |
| PCOM                                     | 10 (12.2)              | 9 (10.7)               |                |
| ICA                                      | 4 (4.9)                | 5 (6.0)                |                |
| PC                                       | 7 (8.5)                | 16 (19.0)              |                |
| Aneurysmal sizes, n (%)                  |                        |                        | 0.006*         |
| 0–4.9 mm                                 | 27 (32.9)              | 22 (26.2)              |                |
| 5–6.9 mm                                 | 27 (32.9)              | 19 (22.6)              |                |
| 7–9.9 mm                                 | 14 (17.1)              | 7 (8.3)                |                |
| 10–19.9 mm                               | 6 (7.3)                | 13 (15.5)              |                |

|                                   |           |           |         |
|-----------------------------------|-----------|-----------|---------|
| ≥20 mm                            | 0         | 6 (7.1)   |         |
| Missing                           | 8 (9.8)   | 17 (20.0) |         |
| Treatment status, n (%)           |           |           | 0.016*  |
| Coil                              | 20 (24.4) | 26 (31.0) |         |
| Clip                              | 62 (75.6) | 52 (61.9) |         |
| No treatment                      | 0         | 6 (7.1)   |         |
| Neurological complications, n (%) |           |           |         |
| CVS                               | 13 (15.9) | 35 (41.7) | <0.001* |
| DCI                               | 9 (11.0)  | 44 (52.4) | <0.001* |
| CH                                | 26 (31.7) | 62 (73.8) | <0.001* |
| Seizures                          | 9 (11.0)  | 14 (16.7) | 0.289   |

*mRS* modified Rankin Scale; *aSAH* aneurysmal subarachnoid hemorrhage, *SD* standard deviation, *IQR* interquartile range, *WFNS* World Federation of Neurosurgical Societies, *GCS* Glasgow Coma Score, *CRP* C-reactive protein, *mg/dL* milligram/deciliter, *mg/L* milligram/liter, *WBC* white blood cell,  $\times 10^9/L \times 10^9/Liter$ , *CLR* C-reactive protein to lymphocyte ratio, *NLR* neutrophil to lymphocyte ratio, *PLR* platelet to lymphocyte ratio, *MLR* monocyte to lymphocyte ratio, *mFisher* modified Fisher, *ACA* anterior cerebral artery, *ACOM* anterior communicating artery, *MCA* middle cerebral artery, *PCOM* posterior communicating artery, *ICA* internal carotid artery, *PC* posterior circulation, *CVS* cerebral vasospasm, *DCI* delayed cerebral ischemia, *CH* chronic hydrocephalus, \* $p < 0.05$  are considered significant

**Supplemental Table S2** Univariate analysis on DCI after aSAH

| Variables                                | DCI (n = 53)           | Non-DCI (n = 113)      | <i>p</i> value |
|------------------------------------------|------------------------|------------------------|----------------|
| Demographics                             |                        |                        |                |
| Age, mean (SD), y                        | 59.68±11.98            | 53.65±11.89            | 0.003*         |
| Female sex, n (%)                        | 38 (71.7)              | 76 (67.3)              | 0.565          |
| Medical history, n (%)                   |                        |                        |                |
| Hypertension                             | 40 (75.5)              | 77 (68.1)              | 0.334          |
| Admission status, median (IQR)           |                        |                        |                |
| WFNS grade                               | 4 (2–5)                | 2 (1–4)                | <0.001*        |
| GCS score                                | 6 (3–13)               | 14 (8–15)              | <0.001*        |
| Admission serum biomarkers, median (IQR) |                        |                        |                |
| CRP, (mg/dL)                             | 1.60 (0.20–1.90)       | 0.40 (0.20–0.90)       | <0.001*        |
| WBC, (×10 <sup>9</sup> /L)               | 14.20 (11.40–16.50)    | 12.60 (10.10–15.60)    | 0.056          |
| Platelet, (×10 <sup>9</sup> /L)          | 226.00 (183.00–270.00) | 233.00 (206.00–285.50) | 0.138          |
| Neutrophil, (×10 <sup>9</sup> /L)        | 12.10 (9.16–14.62)     | 10.83 (7.95–13.73)     | 0.041*         |
| Lymphocyte, (×10 <sup>9</sup> /L)        | 0.97 (0.61–1.50)       | 1.11 (0.80–1.60)       | 0.083          |
| Monocyte, (×10 <sup>9</sup> /L)          | 0.80 (0.62–1.09)       | 0.72 (0.50–1.00)       | 0.181          |
| CLR, (mg×10 <sup>-6</sup> )              | 1.34 (0.21–3.60)       | 0.43 (0.13–0.84)       | <0.001*        |
| NLR                                      | 12.76 (8.14–22.39)     | 9.33 (5.90–15.85)      | 0.012*         |
| PLR                                      | 223.48 (150.13–415.17) | 216.50 (142.31–316.86) | 0.350          |
| MLR                                      | 0.69 (0.56–1.32)       | 0.58 (0.42–0.81)       | 0.010*         |
| Neuroradiological data                   |                        |                        |                |
| mFisher score, median (IQR)              | 4 (3–4)                | 3 (3–4)                | 0.031*         |
| Intracerebral hemorrhage, n (%)          | 19 (35.8)              | 18 (15.9)              | 0.004*         |
| Subdural hemorrhage, n (%)               | 8 (15.1)               | 6 (5.3)                | 0.034*         |
| Aneurysmal locations, n (%)              |                        |                        | 0.079          |
| ACA/ACOM                                 | 17 (32.1)              | 60 (53.1)              |                |
| MCA                                      | 17 (32.1)              | 21 (18.6)              |                |
| PCOM                                     | 8 (15.1)               | 11 (9.7)               |                |
| ICA                                      | 2 (3.8)                | 7 (6.2)                |                |
| PC                                       | 9 (17.0)               | 14 (12.4)              |                |
| Aneurysmal sizes, n (%)                  |                        |                        | 0.012*         |
| 0–4.9 mm                                 | 13 (24.5)              | 36 (31.9)              |                |
| 5–6.9 mm                                 | 9 (17.0)               | 37 (32.7)              |                |
| 7–9.9 mm                                 | 5 (9.4)                | 16 (14.2)              |                |
| 10–19.9 mm                               | 9 (17.0)               | 10 (8.8)               |                |

|                                   |           |           |         |
|-----------------------------------|-----------|-----------|---------|
| ≥20 mm                            | 4 (7.5)   | 2 (1.8)   |         |
| Missing                           | 13 (24.5) | 12 (10.6) |         |
| Treatment status, n (%)           |           |           | 0.152   |
| Coil                              | 10 (18.9) | 36 (31.9) |         |
| Clip                              | 40 (75.5) | 74 (65.5) |         |
| No treatment                      | 3 (5.7)   | 3 (2.7)   |         |
| Neurological complications, n (%) |           |           |         |
| CVS                               | 27 (50.9) | 21 (18.6) | <0.001* |
| CH                                | 39 (73.6) | 49 (43.9) | <0.001* |
| Seizures                          | 8 (15.1)  | 15 (13.3) | 0.752   |
| Neurological functional outcome   |           |           |         |
| 6 months mRS, median (IQR)        | 5 (4–6)   | 2 (1–3)   | <0.001* |

---

*DCI* delayed cerebral ischemia, *aSAH* aneurysmal subarachnoid hemorrhage, *SD* standard deviation, *IQR* interquartile range, *WFNS* World Federation of Neurosurgical Societies, *GCS* Glasgow Coma Score, *CRP* C-reactive protein, *mg/dL* milligram/deciliter, *mg/L* milligram/liter, *WBC* white blood cell,  $\times 10^9/L$   $\times 10^9/L$ iter, *CLR* C-reactive protein to lymphocyte ratio, *NLR* neutrophil to lymphocyte ratio, *PLR* platelet to lymphocyte ratio, *MLR* monocyte to lymphocyte ratio, *mFisher* modified Fisher, *ACA* anterior cerebral artery, *ACOM* anterior communicating artery, *MCA* middle cerebral artery, *PCOM* posterior communicating artery, *ICA* internal carotid artery, *PC* posterior circulation, *CVS* cerebral vasospasm, *CH* chronic hydrocephalus, *mRS* modified Rankin Scale, \* $p < 0.05$  are considered significant

**Supplemental Table S3** Univariate analysis on CH after aSAH

| Variables                                | CH (n = 88)            | Non-CH (n = 78)        | <i>p</i> value |
|------------------------------------------|------------------------|------------------------|----------------|
| Demographics                             |                        |                        |                |
| Age, mean (SD), y                        | 56.26±12.96            | 54.81±11.35            | 0.446          |
| Female sex, n (%)                        | 66 (75.0)              | 48 (61.5)              | 0.062          |
| Medical history, n (%)                   |                        |                        |                |
| Hypertension                             | 64 (72.7)              | 53 (67.9)              | 0.501          |
| Admission status, median (IQR)           |                        |                        |                |
| WFNS grade                               | 4 (2–5)                | 1 (1–3)                | <0.001*        |
| GCS score                                | 9 (3–14)               | 15 (12–15)             | <0.001*        |
| Admission serum biomarkers, median (IQR) |                        |                        |                |
| CRP, (mg/dL)                             | 0.70 (0.20–1.90)       | 0.40 (0.20–0.90)       | 0.038*         |
| WBC, (×10 <sup>9</sup> /L)               | 14.45 (11.93–16.85)    | 11.55 (9.58–13.83)     | <0.001*        |
| Platelet, (×10 <sup>9</sup> /L)          | 219.00 (187.75–273.75) | 251.50 (209.75–282.25) | 0.096          |
| Neutrophil, (×10 <sup>9</sup> /L)        | 12.34 (10.26–14.74)    | 9.34 (7.41–11.71)      | <0.001*        |
| Lymphocyte, (×10 <sup>9</sup> /L)        | 0.95 (0.62–1.52)       | 1.20 (0.82–1.64)       | 0.010*         |
| Monocyte, (×10 <sup>9</sup> /L)          | 0.80 (0.51–1.12)       | 0.73 (0.50–0.89)       | 0.241          |
| CLR, (mg×10 <sup>-6</sup> )              | 0.75 (0.21–1.98)       | 0.33 (0.13–0.95)       | 0.004*         |
| NLR                                      | 12.90 (8.63–19.17)     | 8.46 (4.83–13.05)      | <0.001*        |
| PLR                                      | 240.17 (163.58–352.87) | 198.43 (132.50–296.56) | 0.041*         |
| MLR                                      | 0.69 (0.47–1.08)       | 0.56 (0.39–0.74)       | 0.007*         |
| Neuroradiological data                   |                        |                        |                |
| mFisher score, median (IQR)              | 4 (3–4)                | 3 (3–4)                | <0.001*        |
| Intracerebral hemorrhage, n (%)          | 29 (33.0)              | 8 (10.3)               | <0.001*        |
| Subdural hemorrhage, n (%)               | 9 (10.2)               | 5 (6.4)                | 0.377          |
| Aneurysmal locations, n (%)              |                        |                        | 0.301          |
| ACA/ACOM                                 | 36 (40.9)              | 41 (52.6)              |                |
| MCA                                      | 24 (27.3)              | 14 (17.9)              |                |
| PCOM                                     | 11 (12.5)              | 8 (10.3)               |                |
| ICA                                      | 3 (3.4)                | 6 (7.7)                |                |
| PC                                       | 14 (15.9)              | 9 (11.5)               |                |
| Aneurysmal sizes, n (%)                  |                        |                        | 0.437          |
| 0–4.9 mm                                 | 27 (30.7)              | 22 (28.2)              |                |
| 5–6.9 mm                                 | 21 (23.9)              | 25 (32.1)              |                |
| 7–9.9 mm                                 | 9 (10.2)               | 12 (15.4)              |                |
| 10–19.9 mm                               | 12 (13.6)              | 7 (9.0)                |                |

|                                   |           |           |         |
|-----------------------------------|-----------|-----------|---------|
| ≥20 mm                            | 5 (5.7)   | 1 (1.3)   |         |
| Missing                           | 14 (15.9) | 11 (14.1) |         |
| Treatment status, n (%)           |           |           | 0.838   |
| Coil                              | 24 (27.2) | 22 (28.2) |         |
| Clip                              | 60 (68.2) | 54 (69.2) |         |
| No treatment                      | 4 (4.5)   | 2 (2.6)   |         |
| Neurological complications, n (%) |           |           |         |
| CVS                               | 35 (39.8) | 13 (16.7) | 0.001*  |
| DCI                               | 39 (44.3) | 14 (17.9) | <0.001* |
| Seizures                          | 14 (15.9) | 9 (11.5)  | 0.416   |
| Neurological functional outcome   |           |           |         |
| 6 months mRS, median (IQR)        | 5 (2–6)   | 1 (1–3)   | <0.001* |

*CH* chronic hydrocephalus, *aSAH* aneurysmal subarachnoid hemorrhage, *SD* standard deviation, *IQR* interquartile range, *WFNS* World Federation of Neurosurgical Societies, *GCS* Glasgow Coma Score, *CRP* C-reactive protein, *mg/dL* milligram/deciliter, *mg/L* milligram/liter, *WBC* white blood cell,  $\times 10^9/L$   $\times 10^9/L$ iter, *CLR* C-reactive protein to lymphocyte ratio, *NLR* neutrophil to lymphocyte ratio, *PLR* platelet to lymphocyte ratio, *MLR* monocyte to lymphocyte ratio, *mFisher* modified Fisher, *ACA* anterior cerebral artery, *ACOM* anterior communicating artery, *MCA* middle cerebral artery, *PCOM* posterior communicating artery, *ICA* internal carotid artery, *PC* posterior circulation, *CVS* cerebral vasospasm, *DCI* delayed cerebral ischemia, *mRS* modified Rankin Scale,  $*p < 0.05$  are considered significant

**Supplemental Table S4** Multivariate logistic regression analysis of variables associated with poor outcome (6 months mRS 3-6)

| Variables              | mRS (3-6) (n = 84) |              |         |
|------------------------|--------------------|--------------|---------|
|                        | OR                 | 95% CI       | p value |
| Age                    | 1.029              | 0.987–1.072  | 0.182   |
| WFNS grade             | 0.705              | 0.254–1.958  | 0.502   |
| GCS                    | 0.676              | 0.481–0.949  | 0.024*  |
| CLR                    | 1.474              | 0.997–2.177  | 0.052   |
| NLR                    | 0.952              | 0.879–1.032  | 0.231   |
| MLR                    | 1.215              | 0.417–3.544  | 0.721   |
| mFisher grade          | 1.547              | 0.648–3.696  | 0.326   |
| Intracerebral hematoma | 1.209              | 0.305–4.783  | 0.787   |
| CVS                    | 1.487              | 0.487–4.534  | 0.486   |
| DCI                    | 3.388              | 1.101–10.428 | 0.033*  |
| CH                     | 4.120              | 1.525–11.131 | 0.005*  |

*mRS* modified Rankin Scale, *OR* odds ratio, *CI* confidence interval, *WFNS* World Federation of Neurosurgical Societies, *GCS* Glasgow Coma Score, *CLR* C-reactive protein to lymphocyte ratio, *NLR* neutrophil to lymphocyte ratio, *MLR* monocyte to lymphocyte ratio, *mFisher* modified Fisher, *CVS* cerebral vasospasm, *DCI* delayed cerebral ischemia, *CH* chronic hydrocephalus, \* $p < 0.05$  are considered significant

**Supplemental Table S5** Multivariate logistic regression analysis of variables associated with DCI after aSAH

| Variables              | DCI (n = 53) |             |         |
|------------------------|--------------|-------------|---------|
|                        | OR           | 95% CI      | p value |
| Age                    | 1.025        | 0.990–1.061 | 0.165   |
| WFNS grade             | 1.345        | 0.588–3.078 | 0.483   |
| GCS                    | 0.968        | 0.747–1.254 | 0.805   |
| CLR                    | 1.594        | 1.220–2.084 | 0.001*  |
| Intracerebral hematoma | 1.090        | 0.433–2.742 | 0.854   |

*DCI* delayed cerebral ischemia,, *aSAH* aneurysmal subarachnoid hemorrhage, *OR* odds ratio, *CI* confidence interval, *WFNS* World Federation of Neurosurgical Societies, *GCS* Glasgow Coma Score, *CLR* C-reactive protein to lymphocyte ratio, \* $p < 0.05$  are considered significant

**Supplemental Table S6** Multivariate logistic regression analysis of variables associated with CH after aSAH

| Variables              | CH (n = 88) |             |                |
|------------------------|-------------|-------------|----------------|
|                        | OR          | 95% CI      | <i>p</i> value |
| WFNS grade             | 1.749       | 0.785–3.896 | 0.171          |
| GCS                    | 1.113       | 0.862–1.437 | 0.411          |
| WBC                    | 1.348       | 0.872–2.083 | 0.180          |
| Neutrophil             | 0.755       | 0.458–1.247 | 0.273          |
| CLR                    | 0.957       | 0.843–1.087 | 0.501          |
| NLR                    | 1.069       | 0.990–1.156 | 0.090          |
| mFisher grade          | 1.893       | 0.956–3.749 | 0.067          |
| Intracerebral hematoma | 1.574       | 0.564–4.396 | 0.386          |

*CH* chronic hydrocephalus, *aSAH* aneurysmal subarachnoid hemorrhage, *OR* odds ratio, *CI* confidence interval, *WFNS* World Federation of Neurosurgical Societies, *GCS* Glasgow Coma Score, *WBC* white blood cell, *CLR* C-reactive protein to lymphocyte ratio, *NLR* neutrophil to lymphocyte ratio, *mFisher* modified Fisher,  $*p < 0.05$  are considered significant

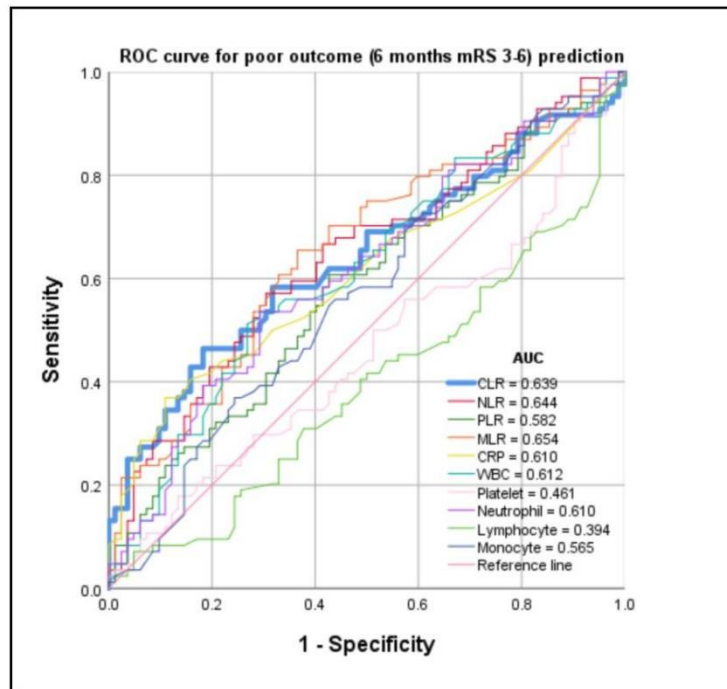

**Supplemental Figure S1** Predictive value of each admission serum biomarkers for poor outcome (6 months mRS 3-6) using receiver operating characteristics (ROC) curve.

**Supplemental Table S7** Comparison of predictive value of different admission serum biomarkers associated with poor outcome (6 months mRS 3-6).

| Predictive biomarkers | AUC   | 95% CI      | Sensitivity (%) | Specificity (%) | Cut-off value              | <i>p</i> value |
|-----------------------|-------|-------------|-----------------|-----------------|----------------------------|----------------|
| CLR                   | 0.639 | 0.555–0.724 | 46.4            | 81.7            | 1.012 mg×10 <sup>-6</sup>  | 0.002*         |
| NLR                   | 0.644 | 0.560–0.728 | 57.1            | 69.5            | 11.806                     | 0.001*         |
| PLR                   | 0.582 | 0.495–0.668 | 60.7            | 56.1            | 215.878                    | 0.069          |
| MLR                   | 0.654 | 0.571–0.737 | 65.5            | 63.4            | 0.619                      | 0.001*         |
| CRP                   | 0.610 | 0.523–0.696 | 36.9            | 89.0            | 1.500 mg/dL                | 0.015*         |
| WBC                   | 0.612 | 0.527–0.698 | 51.2            | 73.2            | 14.150 ×10 <sup>9</sup> /L | 0.012*         |
| Platelet              | 0.461 | 0.372–0.549 | 17.9            | 86.6            | 303.000×10 <sup>9</sup> /L | 0.381          |
| Neutrophil            | 0.610 | 0.524–0.696 | 53.6            | 70.7            | 11.815×10 <sup>9</sup> /L  | 0.014*         |
| Lymphocyte            | 0.394 | 0.308–0.480 | 7.1             | 95.1            | 2.310×10 <sup>9</sup> /L   | 0.018*         |
| Monocyte              | 0.565 | 0.478–0.653 | 36.9            | 75.6            | 0.935×10 <sup>9</sup> /L   | 0.146          |

*mRS* modified Rankin Scale, *AUC* area under the curve, *CI* confidence interval, *CLR* C-reactive protein to lymphocyte ratio, *NLR* neutrophil to lymphocyte ratio, *PLR* platelet to lymphocyte ratio, *MLR* monocyte to lymphocyte ratio, *CRP* C-reactive protein, *WBC* white blood cell, \**p* < 0.05 are considered significant.

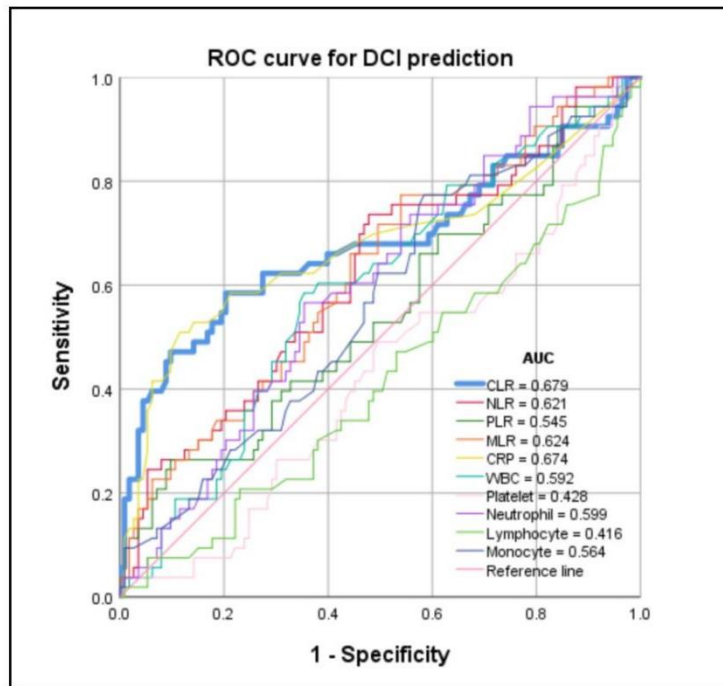

**Supplemental Figure S2** Predictive value of each admission serum biomarkers for delayed cerebral ischemia (DCI) using receiver operating characteristics (ROC) curve.

**Supplemental Table S8** Comparison of predictive value of different admission serum biomarkers associated with DCI.

| Predictive biomarkers | AUC   | 95% CI      | Sensitivity (%) | Specificity (%) | Cut-off value              | <i>p</i> value |
|-----------------------|-------|-------------|-----------------|-----------------|----------------------------|----------------|
| CLR                   | 0.679 | 0.581–0.777 | 58.5            | 79.6            | 1.012 mg×10 <sup>-6</sup>  | <0.001*        |
| NLR                   | 0.621 | 0.528–0.714 | 73.6            | 52.2            | 9.721                      | 0.012*         |
| PLR                   | 0.545 | 0.448–0.642 | 26.4            | 90.3            | 398.444                    | 0.350          |
| MLR                   | 0.624 | 0.533–0.715 | 77.4            | 46.0            | 0.562                      | 0.010*         |
| CRP                   | 0.674 | 0.575–0.774 | 50.9            | 88.5            | 1.500 mg/dL                | <0.001*        |
| WBC                   | 0.592 | 0.500–0.684 | 58.5            | 64.6            | 13.850×10 <sup>9</sup> /L  | 0.056          |
| Platelet              | 0.428 | 0.335–0.522 | 98.1            | 5.3             | 131.500×10 <sup>9</sup> /L | 0.138          |
| Neutrophil            | 0.599 | 0.508–0.689 | 56.6            | 64.6            | 11.720×10 <sup>9</sup> /L  | 0.041*         |
| Lymphocyte            | 0.416 | 0.322–0.511 | 7.5             | 94.7            | 2.310×10 <sup>9</sup> /L   | 0.083          |
| Monocyte              | 0.564 | 0.471–0.658 | 77.4            | 41.6            | 0.605×10 <sup>9</sup> /L   | 0.181          |

*DCI* delayed cerebral ischemia, *AUC* area under the curve, *CI* confidence interval, *CLR* C-reactive protein to lymphocyte ratio, *NLR* neutrophil to lymphocyte ratio, *PLR* platelet to lymphocyte ratio, *MLR* monocyte to lymphocyte ratio, *CRP* C-reactive protein, *WBC* white blood cell, \**p* < 0.05 are considered significant.

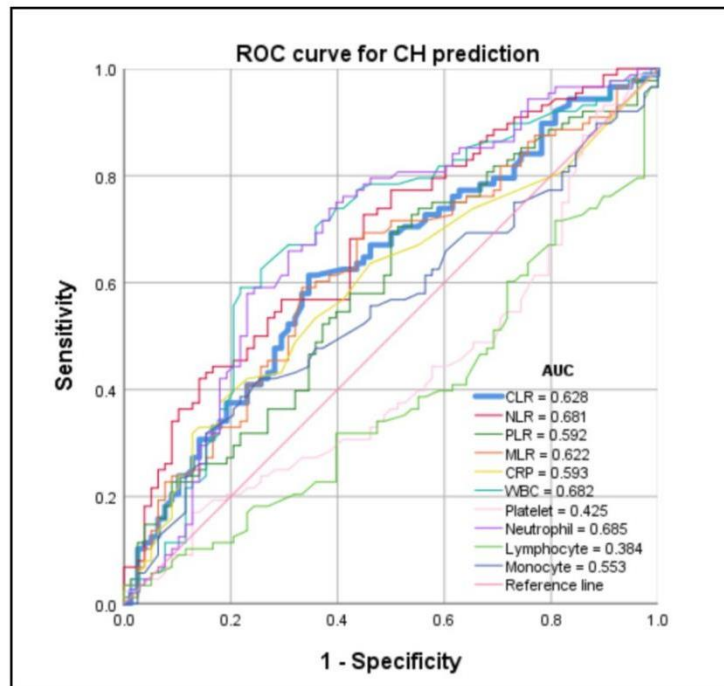

**Supplemental Figure S3** Predictive value of each admission serum biomarkers for chronic hydrocephalus (CH) using receiver operating characteristics (ROC) curve.

**Supplemental Table S9** Comparison of predictive value of different admission serum biomarkers associated with CH.

| Predictive biomarkers | AUC   | 95% CI      | Sensitivity (%) | Specificity (%) | Cut-off value              | <i>p</i> value |
|-----------------------|-------|-------------|-----------------|-----------------|----------------------------|----------------|
| CLR                   | 0.628 | 0.543–0.713 | 61.4            | 65.4            | 0.510 mg×10 <sup>-6</sup>  | 0.005*         |
| NLR                   | 0.681 | 0.601–0.762 | 42.0            | 85.9            | 15.845                     | <0.001*        |
| PLR                   | 0.592 | 0.505–0.679 | 69.3            | 50.0            | 189.583                    | 0.041*         |
| MLR                   | 0.622 | 0.537–0.707 | 59.1            | 66.7            | 0.658                      | 0.007*         |
| CRP                   | 0.593 | 0.506–0.680 | 37.5            | 82.1            | 1.150 mg/dL                | 0.039*         |
| WBC                   | 0.682 | 0.598–0.766 | 59.1            | 78.2            | 13.950 ×10 <sup>9</sup> /L | <0.001*        |
| Platelet              | 0.425 | 0.337–0.513 | 17.0            | 87.2            | 306.500×10 <sup>9</sup> /L | 0.096          |
| Neutrophil            | 0.685 | 0.602–0.768 | 73.9            | 61.5            | 10.435×10 <sup>9</sup> /L  | <0.001*        |
| Lymphocyte            | 0.384 | 0.299–0.469 | 96.6            | 0               | 3.455×10 <sup>9</sup> /L   | 0.010*         |
| Monocyte              | 0.553 | 0.465–0.641 | 38.6            | 78.2            | 0.935×10 <sup>9</sup> /L   | 0.241          |

CH chronic hydrocephalus, AUC area under the curve, CI confidence interval, CLR C-reactive protein to lymphocyte ratio, NLR neutrophil to lymphocyte ratio, PLR platelet to lymphocyte ratio, MLR monocyte to lymphocyte ratio, CRP C-reactive protein, WBC white blood cell, \**p* < 0.05 are considered significant.
